# Supplementary material for: The Parallel Pandemic: A Systematic Review on the Effects of the COVID-19 Pandemic on OCD among Children and Adolescents
Source: MDPI journal article supplement (doi:10.3390/ijerph20237095), 2023-11-22
Supplement: s1 [file s1]

| Author                | Year | Keywords                                                                                                            | Study Design                                                           | Location | Age of pediatric sample | Mental health outcomes studied | Method of outcome assessment   | Pandemic and OCD correlation | Key findings and conclusions                                                                                                                                                                                                                                                                                                                                                                                                                                                                                                                                                                                                                                                                                                                                                              |
|-----------------------|------|---------------------------------------------------------------------------------------------------------------------|------------------------------------------------------------------------|----------|-------------------------|--------------------------------|--------------------------------|------------------------------|-------------------------------------------------------------------------------------------------------------------------------------------------------------------------------------------------------------------------------------------------------------------------------------------------------------------------------------------------------------------------------------------------------------------------------------------------------------------------------------------------------------------------------------------------------------------------------------------------------------------------------------------------------------------------------------------------------------------------------------------------------------------------------------------|
| Findik <sup>44</sup>  | 2023 | Adolescent; Depression; Emergency; Mental health; Pandemic                                                          | Retrospective chart review                                             | Turkey   | Under 18                | OCD                            | Prevalence                     | Positive correlation         | <p>OCD increased in the post pandemic period significantly.</p> <p>There was no statistically significant difference between the years in terms of outpatient clinic appointment, transfer to hospitalization, reasons for presentation and psychiatric diagnoses of those transferred to hospitalization.</p>                                                                                                                                                                                                                                                                                                                                                                                                                                                                            |
| McKune <sup>48</sup>  | 2023 | COVID-19; Pediatrics; Mental health; School-aged children; Anxiety, depression; Obsessive-compulsive disorder (OCD) | Longitudinal study (Composed of with three cross-sectional timepoints) | USA      | Under 22                | OCD                            | Prevalence                     | Positive correlation         | <p>The prevalence of anxiety, depression, or OCD moved from 47.1, to 57.2, to 42.2% across the three timepoints during the study.</p> <p>By endline of the study, in April 2021, non-white children were at higher risk for depression and OCD.</p> <p>Risk for anxiety, depression, and OCD was associated with students who lost a family member due to COVID-19 and who were identified as at-risk in previous timepoints.</p> <p>Race was significantly associated with risk of depression and OCD, with Non-White participants being at higher risk of depression compared to White participants.</p> <p>Parental belief that vaccinating their child was not important for the health of others in the community was protective against their child presenting at risk for OCD.</p> |
| Stewart <sup>49</sup> | 2023 | COVID; Outcome; Age; Psychiatry; Access; Determinant; Child; Adolescent; Poverty; LGBTQ; Gender                     | Cohort study                                                           | Canada   | Under 18                | OCD                            | Prevalence, Worsening symptoms | Positive correlation         | <p>OCD Rate was multi-fold of those reported by pre-pandemic studies.</p> <p>Across all age groups, the lifetime diagnosis of a psychiatric illness was a determinant for current psychiatric problems and/or unmet MH support needs during the pandemic.</p> <p>Poverty, limited education, female and non-binary gender, xLGBTQ2S + status and special educational, psychiatric and medical conditions were differentially identified as determinants across age groups.</p>                                                                                                                                                                                                                                                                                                            |
| Tomczak <sup>40</sup> | 2023 | Tourette syndrome; Chronic tic disorder; Obsessive-compulsive disorder; Screen time; Children/adolescents; Pandemic | Cross-sectional study                                                  | USA      | Under 18                | OCD                            | Worsening symptoms             | Positive Correlation         | <p>Children with OCD report a significant, subjectively worse impact of COVID-19 on home life as compared to children with tics and OCD + Tics.</p> <p>Children with OCD, CTD, and OCD + Tics reported that the pandemic had a negative impact on</p>                                                                                                                                                                                                                                                                                                                                                                                                                                                                                                                                     |

|                               |      |                                                                                                                                                                              |                            |           |          |     |                                |                      |                                                                                                                                                                                                                                                                                                                                                 |
|-------------------------------|------|------------------------------------------------------------------------------------------------------------------------------------------------------------------------------|----------------------------|-----------|----------|-----|--------------------------------|----------------------|-------------------------------------------------------------------------------------------------------------------------------------------------------------------------------------------------------------------------------------------------------------------------------------------------------------------------------------------------|
|                               |      |                                                                                                                                                                              |                            |           |          |     |                                |                      | activities outside of school, relationships with friends, and family/ community gatherings.                                                                                                                                                                                                                                                     |
| Charalampopoulou <sup>5</sup> | 2022 | Autism; Children; COVID; Mental health; Pandemic.                                                                                                                            | Cross-sectional study      | Canada    | Under 18 | OCD | Worsening symptoms             | Positive correlation | In Autistic children whose MH deteriorated, OCD symptoms were significantly higher than in unchanged children.                                                                                                                                                                                                                                  |
| Hamid <sup>4</sup>            | 2022 | Pediatrics; Obsessive compulsive disorder; Anxiety; Depression; Covid-19                                                                                                     | Cross-sectional study      | Canada    | Under 18 | OCD | Prevalence                     | Positive correlation | 15.5% of participants exhibited OCD symptoms.<br><br>Significant association between diagnosis of family member or frontline worker and presence of OCD symptoms.                                                                                                                                                                               |
| Henein <sup>32</sup>          | 2022 | Obsessive-compulsive disorder; Children and adolescents; COVID-19; CAMHS referrals; Symptom Exacerbation; Cognitive behavioural therapy; Pharmacotherapy; Service evaluation | Retrospective chart review | UK        | Under 18 | OCD | Prevalence, Worsening symptoms | Positive correlation | 5.62% assessments to Child and Adolescent Mental Health Services were related to OCD in 2020, which is higher when compared to 1.30% and 2.27% assessments in the pre-pandemic times (2018 and 2019).<br><br>Adolescent Mental Health Service (CAMHS) fell in 2020, whilst the proportion of assessments related to OCD increased significantly |
| Ibeziako <sup>37</sup>        | 2022 | Coronavirus pandemic; Diagnosis; Psychiatric; Eating disorders; Ed boarding; Mental health; Pandemics; Trend; Inpatients; Depressive disorders; psychiatry                   | Retrospective chart review | USA       | Under 18 | OCD | Prevalence                     | Positive correlation | Trend of increased hand washing and other infection control compulsions did not increase during larger second wave                                                                                                                                                                                                                              |
| Khan <sup>7</sup>             | 2022 | COVID-19; Pandemic fears; Adolescents; Mental disorder; Obsessive-compulsive symptoms                                                                                        | Cross-sectional study      | Qatar     | Under 18 | OCD | Prevalence                     | Positive correlation | Over half of the young People with mental health disorders that had significant pandemic over half seemed to have significant Obsessive-Compulsive symptoms<br><br>pandemic fear likely to be associated with OCD                                                                                                                               |
| Kroon <sup>38</sup>           | 2022 | COVID-19; OCD; Mental health; Family; Children                                                                                                                               | Longitudinal study         | Australia | Under 18 | OCD | Worsening symptoms             | Positive correlation | Overall sample showed increased OCD symptom severity compared to normative pre pandemic sample.<br><br>There was a significant positive association between parental worries and child mental health symptoms.                                                                                                                                  |
| Tanir <sup>35</sup>           | 2022 | Not provided                                                                                                                                                                 | Cross-sectional study      | Turkey    | Under 18 | OCD | Worsening symptoms             | Positive correlation | Significant increase in contamination obsessions and cleaning/ washing compulsions.<br><br>There was a significant relationship between the change in CY-BOCS scores with talking about COVID-19 and diagnosis of someone familiar.                                                                                                             |

|                                 |      |                                                                                          |                                                      |         |          |                       |                                |                      |                                                                                                                                                                                                                 |
|---------------------------------|------|------------------------------------------------------------------------------------------|------------------------------------------------------|---------|----------|-----------------------|--------------------------------|----------------------|-----------------------------------------------------------------------------------------------------------------------------------------------------------------------------------------------------------------|
| Tekin <sup>39</sup>             | 2022 | COVID-19 pandemic; Psychosocial symptoms; Adolescent; Quality of life                    | Cross-sectional (With retrospective data collection) | Turkey  | Under 18 | OCD                   | Prevalence                     | Positive correlation | A statistically significant increase was observed in all depression, anxiety, and OCD scores evaluated with the RCADS-parent report compared with the pre-pandemic period.                                      |
| Carmi <sup>29</sup>             | 2021 | OCD; CBT; COVID-19                                                                       | Cohort study                                         | Israel  | Under 22 | OCD                   | Worsening symptoms             | No correlation       | OCD patients did not experience exacerbated symptoms during COVID-19 at their 2- and 6-month follow-ups.                                                                                                        |
| Halil <sup>31</sup>             | 2021 | Obsessive-compulsive disorder; Covid-19; Stressor; Children                              | Longitudinal study                                   | Turkey  | Under 18 | OCD                   | Worsening symptoms             | Positive correlation | OCD severity was significantly increased during the pandemic.<br><br>sexual obsessions increased as well as contamination and illness obsessions.                                                               |
| McKune <sup>47</sup>            | 2021 | COVID-19; Mental health; Psychosocial impacts; Vulnerable population; Pandemic           | Cross-sectional study                                | USA     | Under 22 | OCD                   | Worsening symptoms             | Positive correlation | Loss of household income, being female and lower school grade all associated with increased OCD symptoms stemming from Pandemic.                                                                                |
| Schwartz-Lifshitz <sup>50</sup> | 2021 | COVID-19; OCD; Exacerbation; Course                                                      | Longitudinal study                                   | Israel  | Under 18 | OCD                   | Worsening symptoms             | No correlation       | OCD symptoms did not exacerbate.<br><br>More patients improved then deteriorated                                                                                                                                |
| Tombeau-Cost <sup>36</sup>      | 2021 | COVID-19; Child and adolescent psychiatry; Neurodevelopmental disorders                  | Cross-sectional study                                | Canada  | Under 18 | OCD                   | Worsening symptoms             | Mixed findings       | obsessions/compulsions deterioration was correlated with having a pre-diagnosed psychiatric disorder, greater economic concerns and stress from social isolation.<br><br>Deterioration highest in ages 13-18    |
| Conte <sup>45</sup>             | 2020 | Tourette syndrome; COVID-19; Pandemic; Mental health; Tics; Children; Adolescents        | Cross-sectional study                                | Italy   | Under 22 | Tourette's, OCD       | Prevalence, Worsening symptoms | Positive correlation | 67% of individuals with TS were rated by their parents as having a worse clinical condition.<br><br>The most worsened symptoms included tics, hyperactivity, rage attacks, obsessions/compulsions, and anxiety. |
| Darvishi <sup>30</sup>          | 2020 | Cognitive errors; Obsessive-compulsive disorders; Young people; Coronavirus disease 2019 | Cross-sectional study                                | Iran    | Under 22 | Cognitive Errors, OCD | Worsening symptoms             | Mixed findings       | 67.3% of subjects evaluated exhibited OCD symptomatology, with significant differences in gender as well as cognitive errors.                                                                                   |
| Nissen <sup>33</sup>            | 2020 | Obsessive compulsive disorder; Children; Adolescents, COVID-19, Trauma, OCD              | Case-Control Study                                   | Denmark | Under 22 | OCD                   | Worsening symptoms             | Positive correlation | Worsening of OCD symptoms occurred for both newly diagnosed and previously treated patients during the pandemic.<br><br>Aggressive symptoms, early age of onset and familial ADHD predicted worsening           |
| O'Dor <sup>41</sup>             | 2020 | Obsessive-compulsive disorder; Pediatric; Psychiatry; PANS; PANDAS; Tics                 | Cross-sectional study                                | USA     | Under 18 | OCD                   | Prevalence, Worsening symptoms | Positive correlation | Children with suspected or diagnosed COVID-19 experienced new or worsened psychiatric                                                                                                                           |

|                          |      |              |                       |     |          |          |       |                |                                                                                                                                                                                                                                                                                                                                                    |
|--------------------------|------|--------------|-----------------------|-----|----------|----------|-------|----------------|----------------------------------------------------------------------------------------------------------------------------------------------------------------------------------------------------------------------------------------------------------------------------------------------------------------------------------------------------|
|                          |      |              |                       |     |          |          |       |                | <p>symptoms, particularly mood lability, OCD, and anxiety.</p> <p>Caregivers reported negative impacts on their child's relationships with friends, extended family, participation in hobbies, and academic skills.</p> <p>However, the majority of respondents felt the pandemic had a positive impact on their relationship with their child</p> |
| Oosterhoff <sup>46</sup> | 2020 | Not provided | Cross-sectional study | USA | Under 22 | Hoarding | Other | Mixed findings | <p>19.7% of adolescents exhibited hoarding behaviours.</p> <p>Positive association with females and news monitoring.</p>                                                                                                                                                                                                                           |

Summary of articles (n= 22)
