# Supplementary material for: The Parallel Pandemic: A Systematic Review on the Effects of the COVID-19 Pandemic on OCD among Children and Adolescents
Source: Int J Environ Res Public Health. 2023 Nov 22;20(23):7095. doi: 10.3390/ijerph20237095 (PMC10706205; doi:10.3390/ijerph20237095)
Supplement: Supplementary file 1 [file ijerph-20-07095-s001.zip › Quality Assessment Score of selected articles.xlsx]

## Sheet: Sheet1
Title	Author	Year	What is the mean age of the paeds population?	Total sample size (paeds)	Was the research question/objective stated?	Was the study population clearly defined and specified	Was the participate rate of eligible persons at least 50%	Were all subjects selected or recruited from the same or similar population? Were the inclusion and exclusion criteria for being in the study prespecified and applied uniformly to all participants?	Was the sample size justification, power description or variance and effect estimates provided	For the analyses in this paper were the exposures of interest measured prior to the outcome measured?	Was the timeframe sufficent so that one could reasonably expect to see an association between exposure and outcome if it existed?	For exposures that can vary in any amount or level, did the study examine different levels of the exposure as related to the outcomes (e.g. categories of exposure measured as continuous variable)	Were the exposure measures (independant variables) clearly defined, valid, reliable and implemented consistently across all study participants?	Was the exposures assessed more than once over time?	Were the outcome measures clearly defined, valid, reliable and implemented consistently across all study participants	Were the outcome assessors blinded to the exposure status of participants?	Was loss to follow up after baseline 20% or less	Were key potential confounding variables measured and adjusted statistically for their impact on the relationship between exposures and outcomes	Number of Positive Answers	Should this study be included based on quality? rate below as good, fair or poor	Should this study be included based on quality? rate below as good, fair or poor
The impact of the COVID-19 pandemic on pediatric mental health emergency. Turkish archives of pediatrics	Findik	2023	13-15	545(545)	Yes	Yes	N/A	Yes	Yes	N/A	Yes	N/A	Yes	No	Yes	N/A	Yes	No	8	Yes	Good
The infected and the affected: A longitudinal study of the impact of the COVID-19 pandemic on schoolchildren in Florida	McKune	2023	Unknown	569	Yes	Yes	N/A	Yes	Yes	N/A	Yes	N/A	Yes	Yes	Yes	N/A	Yes	Yes	10	Yes	Good
Age-specific determinants of psychiatric outcomes after the first COVID-19 wave: baseline findings from a Canadian online cohort study	Stewart	2023	10--12	3140 (618)	Yes	Yes	N/A	Yes	Yes	N/A	Yes	N/A	Yes	No	Yes	N/A	Yes	Yes	9	Yes	Good
Subjective impact of COVID-19 pandemic on youth with tic and OCD spectrum disorders. Personalized Medicine in Psychiatry, 39, 100103	Tomczak	2023	Unknown (median of 12)	48 (48)	Yes	Yes	Yes	Yes	Yes	N/A	Yes	N/A	Yes	No	Yes	N/A	Yes	No	9	Yes	Good
Mental health profiles of autistic children and youth during the COVID-19 pandemic	Charalampopoulou	2022	10--12	230(222)	Yes	Yes	No	Yes	No	N/A	Yes	N/A	Yes	No	Yes	N/A	Yes	Yes	8	Yes	Fair
Mental Health Consequences of the COVID-19 Pandemic Among Ontario's Youth: A Cross-Sectional Study	Hamid	2022	13-15	246 (unknown)	Yes	Yes	N/A	Yes	Yes	N/A	Yes	N/A	Yes	No	Yes	N/A	Yes	Yes	9	Yes	Good
Obsessive–compulsive disorder in treatment seeking children & adolescents during the COVID-19 pandemic.	Henein	2022	13-15	58(58)	Yes	Yes	N/A	Yes	No	N/A	Yes	N/A	Yes	No	Yes	N/A	Yes	No	7	Yes	Fair
Pediatric Mental Health Presentations and Boarding: First Year of the COVID-19 Pandemic	Ibeziako	2022	Unknown	3799 (3799)	Yes	Yes	Yes	Yes	No	N/A	Yes	N/A	Yes	Yes	Yes	N/A	Yes	No	8	Yes	Good
Mostly worse, occasionally better: impact of COVID‑19 pandemic on the mental health of Canadian children and adolescents	Katherine Tombeau Cost	2022	13-15	347(includes only those who completed outcome measures, 347)	Yes	Yes	Yes	Yes	Yes	Yes	Yes	N/A	Yes	No	Yes	No	N/A	Yes	10	Yes	Good
Parental surveillance of OCD and mental health symptoms during COVID-19: A longitudinal study of Australian children, adolescents and families	Kroon	2022	07--09	141(141)	Yes	Yes	N/A	Yes	Yes	N/A	Yes	N/A	Yes	Yes	Yes	N/A	No	Yes	9	Yes	Good
The COVID-19 pandemic and children with PANS/PANDAS: an evaluation of symptom severity, telehealth, and vaccination hesitancy.	O'Dor	2022	10--12	52(52)	Yes	Yes	N/A	Yes	No	No	Yes	N/A	Yes	No	Yes	N/A	Yes	Yes	8	Yes	Good
Evaluation of Psychosocial Symptoms in Adolescents During the COVID-19 Pandemic in Turkey by Comparing Them with the Pre-pandemic Situation and Its Relationship with Quality of Life.	Tekin	2022	13.2	118(118)	Yes	Yes	N/A	Yes	No	No	Yes	N/A	Yes	No	Yes	N/A	Yes	Yes	8	Yes	Good
Obsessive Compulsive Disorder During Coronavirus Disease 2019 (COVID-19): 2- and 6-Month Follow-Ups in a Clinical Trial.	Camri	2021	13-15	113 (25)	Yes	Yes	Yes	Yes	Yes	N/A	Yes	N/A	Yes	N/A	Yes	No	Yes	Yes	10	Yes	Good
Changes in Symptoms and Severity of Obsessive Compulsive Disorder in Children and Adolescent Patients following the Covid-19 Pandemic	Halil	2021	10--12	73(73)	Yes	Yes	N/A	Yes	No	N/A	Yes	N/A	Yes	Yes	Yes	N/A	Yes	Yes	9	Yes	Good
COVID-19 pandemic fears and obsessive-compulsive symptoms in adolescents with pre-existing mental disorders: An exploratory cross-sectional study	Khan	2021	Unknown	63(63)	Yes	Yes	Yes	Yes	Yes	N/A	No	Yes	Yes	Yes	Yes	N/A	Yes	Yes	11	Yes	Good
Obsessive compulsive symptoms severity among children and adolescents during COVID-19 first wave in Israel	M. Schwartz-Lifshitz	2021	13-15	29 (29)	Yes	Yes	Yes	Yes	Yes	Yes	Yes	N/A	Yes	No	Yes	No	N/A	Yes	10	Yes	Good
Psychosocial health of school-aged children during the initial COVID-19 safer-at-home school mandates in Florida: a cross-sectional study	McKune	2021	Unknown	280 (280)	Yes	Yes	No	Yes	N/A	N/A	Yes	No	Yes	Yes	Yes	N/A	No	Yes	8	Yes	Good
Adverse Mental Health Impact of the COVID-19 Lockdown in Individuals With Tourette Syndrome in Italy: An Online Survey	Conte	2020	Unknown	223(190)	Yes	Yes	N/A	N/A	No	Yes	Yes	No	No	No	Yes	N/A	Yes	Yes	7	Yes	Fair
A Cross-Sectional Study on Cognitive Errors and Obsessive-Compulsive Disorders among Young People During the Outbreak of Coronavirus Disease 2019.	Darvishi	2020	16-17	150 (unknown)	Yes	Yes	N/A	N/A	Yes	N/A	N/A	N/A	N/A	N/A	Yes	N/A	N/A	No	4	Yes	Fair
The immediate effect of COVID-19 pandemic on children and adolescents with obsessive compulsive disorder	Nissen	2020	13-15	102 (92)	Yes	Yes	No	Yes	Yes	N/A	Yes	N/A	N/A	N/A	Yes	N/A	Yes	Yes	8	Yes	Good
Attitudes and Psychological Factors Associated With News Monitoring, Social Distancing, Disinfecting, and Hoarding Behaviors Among US Adolescents During the Coronavirus Disease 2019 Pandemic	Oosterhoff	2020	16-17	770 (770)	Yes	Yes	N/A	Yes	Yes	Yes	No	N/A	Yes	No	Yes	No	N/A	Yes	8	Yes	Good
Exacerbation of obsessive compulsive disorder symptoms in children and adolescents during COVID-19 pandemic	Tanir	2020	13-15	61(61)	Yes	Yes	Yes	Yes	Yes	Yes	Yes	Yes	Yes	Yes	Yes	No	Yes	No	12	Yes	Good
